# Supplementary material for: The gut microbiota-inflammation-brain axis in end-stage renal disease: perspectives from default mode network
Source: PubMed Central journal article supplement (PMC6857049; doi:10.7150/thno.35387), 2019-10-18
Supplement: thnov09p8171s1.pdf [file thnov09p8171s1.pdf]

## **Supplementary Materials:**

### **Scanning parameters and preprocessing steps:**

The scanning parameters of rs-fMRI: repetition time (TR) = 2,000 ms, echo time (TE) = 30 ms, field of view (FOV) = 240×240 mm<sup>2</sup>, flip angle = 90°, acquisition matrix = 64 × 64, 250 time points, slice thickness = 3 mm, slices = 43, 250 volumes and 30 axial slices for whole-brain coverage.

The scanning parameters of 3D-T1WI: TR = 1,900 ms, TE = 2.26 ms, FOV = 250×250 mm<sup>2</sup>, slice thickness = 1.0 mm, gap = 0.5 mm, flip angle = 9°, resolution matrix = 256 × 256 and 176 slices in the sagittal orientation.

Rs-fMRI preprocessing included the following 6 steps: (1) the first 10 volumes of each fMRI image were discarded for the signal equilibrium/scanner stabilization and participants' adaptation to the scanning noise; (2) slice timing, realignment, and head motion correction were performed for the remaining 240 volumes; (3) high-resolution 3D-T1WI data were co-registered to the mean realigned functional images for each individual, and the transformed T1 structural images were segmented into gray matter, white matter, and cerebrospinal fluid. The realigned functional volumes were spatially normalized to the Montreal Neurological Institute (MNI) space and then each voxel was re-sampled to 3×3×3 mm<sup>3</sup>; (4) the images were spatially smoothed with a 6-mm full-width at half-maximum Gaussian kernel; (5) the functional images were further linearly detrended, and temporal band-pass filtering (0.01-0.08 Hz) was performed to reduce the effect of physiological high-frequency noise and low-frequency drifts; (6) to reduce the effects of confounding factors, the nuisance signal (white matter, cerebrospinal fluid, and global signal) and the Friston 24-parameter model was eliminated by regression analyses.

### **Gut microbiota analysis procedures:**

DNA samples were quantified and validated by Qubit 2.0 (Invitrogen, Carlsbad, CA, USA), and then the V3-V4 hypervariable region of 16S rRNA was selected as a target fragment for amplification and sequencing. PCR mixture was configured for PCR amplification, and PCR product was selected by agarose gel electrophoresis to select a specific length band, tapping and recovering the purified target band. The same amount of amplification solution was conducted with Illumina MiSeq sequencing with a double-ended PE300 strategy following the instrument manual (Illumina, San Diego, CA, USA). Image analysis and data conversion processes were computed by using the instrument's own software, MiSeq Control Software (2.5.0.5).

The raw reads were filtered to remove low quality and polyclonal sequences in QIIME (Version 1.9.1). The filtered data were further compared with the Gold database and the chimera reads were detected by using Uchime algorithm in Usearch software (Version 8.1.1861). And the effective tags were clustered using the Uclust method of QIIME software (Version 1.9.1) according to Operational Taxonomic Units with 97% similarity. Each OTU representative sequence was selected for species annotation and classification by using QIIME software (Version 1.9.1) and Silva database (Release 132). The Alpha diversity Shannon index was calculated by using QIIME software (Version 1.9.1).

The species difference analysis at all species levels were performed based on the bacterial population difference statistics of the fecal samples between the two groups by the Linear Discriminant Analysis Effect Size software. Based on the information on the abundance distribution of the horizontal species, the Wilcoxon signed rank test was performed between the two groups, and the genus species with significant differences between the two groups were obtained and the abundance distribution map was drawn.

### **Mediation analysis steps:**

According to the standard conventions of a mediation analysis, the test comprises four steps: (1) path c: the effect of the gut microbiota on DMN topological alterations, namely, the total effect of the predictors on the outcome; (2) path a: the effect of the gut microbiota on

systematic inflammation; (3) path b: the relationship between systematic inflammation and DMN topological alterations after controlling for the gut microbiota; and (4) the  $a \times b$  effect, which was referred to as the indirect effect and indicates whether the predictor-outcome relationship was significantly reduced after controlling for the mediator. In the interest of minimizing the number of statistical comparisons, only the indexes displaying a significant difference between the ESRD and HC groups were entered into this mediation model as candidate mediators. In these tests, age and sex were also included as covariates.

## Supplementary Figures and Figure Legends

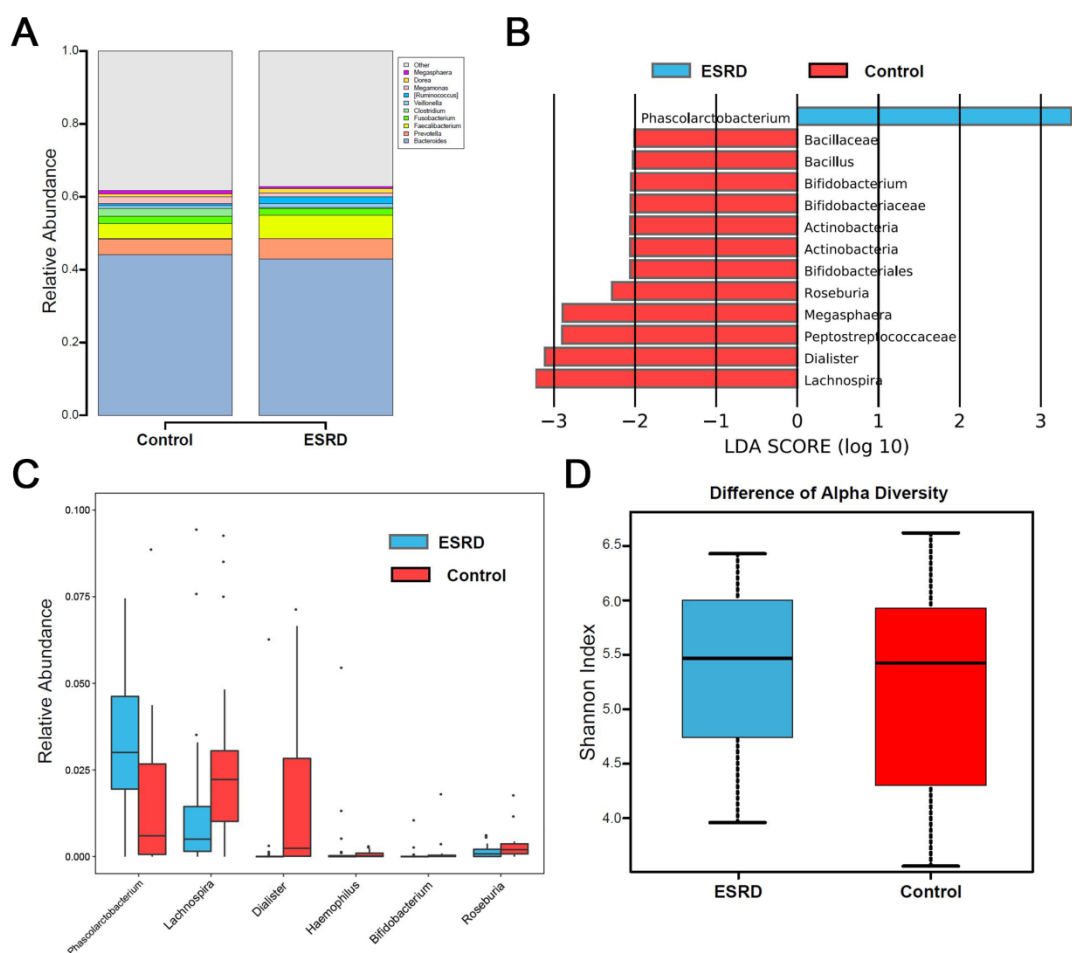

**Figure S1. Analysis of Gut Microbiota in Patients with ESRD**

**Panel A** shows that ESRD and the HC groups were mainly abundant with Bacteroides.

**Panel B** is the species abundance LefSe difference analysis. The ESRD group was mainly enriched in the Phascolarctobacterium, while HC group was mainly enriched in the Roseburia, Megasphaera, Peptostreptococcaceae, Dialister, Lachnospira, Bifidobacteriales, Bifidobacteriaceae, Bifidobacterium, Bacillaceae, Bacillus and Actinobacteria. **Panel C** is the Wilcox differential analysis based on genus-level species abundancies. The ESRD group was mainly enriched in Phascolarctobacterium, Holdemania and Eggerthella, while mainly decreased in Roseburia, Lachnospira, Dialister and Bifidobacterium. **Panel D** is the Alpha diversity analysis of microflora. The differences of intestinal flora alpha diversity between the ESRD group and HC group was not significant ( $p = 0.497$ ) according to the Shannon index.

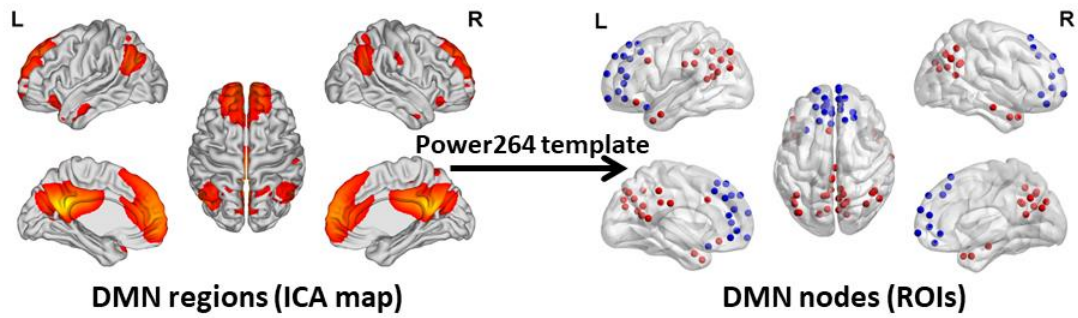

**Figure S2. DMN regions and DMN Nodes using Power 264 Atlas**

The graphs depict the 55 DMN nodes derived from the functional atlas (Power 246) that were used for the primary analysis. The picture on the left side shows the DMN map and the picture on the right side shows the ROI selected according to the DMN map. The blue ROIs represent the regions belong to the anterior DMN and the red ROIs represent the regions belong to the posterior DMN. The picture is made using the BrainNet Viewer software (<http://www.nitrc.org/projects/bnv>).

DMN: default mode network; ICA: independent component analysis; ROI: region of interest

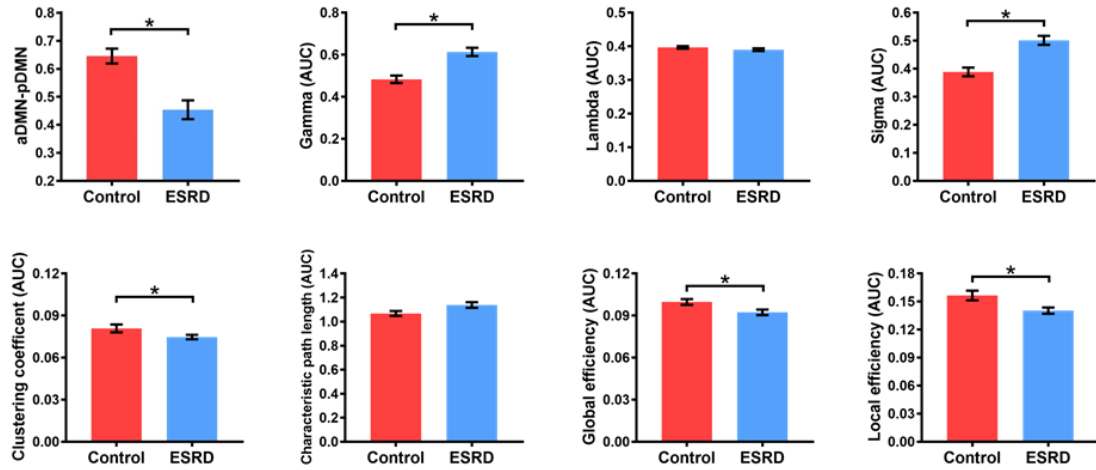

**Figure S3. Differences in Global Network Measures of the DMN using Power 264 Atlas**

The graphs show global network measures of the DMN. The red histogram represents healthy controls and the blue histogram represents ESRD patients. Black asterisks (\*) indicate the significant difference between groups ( $p < 0.05$ ).

DMN: default mode network; ESRD: end-stage renal disease; AUC: area under the curve

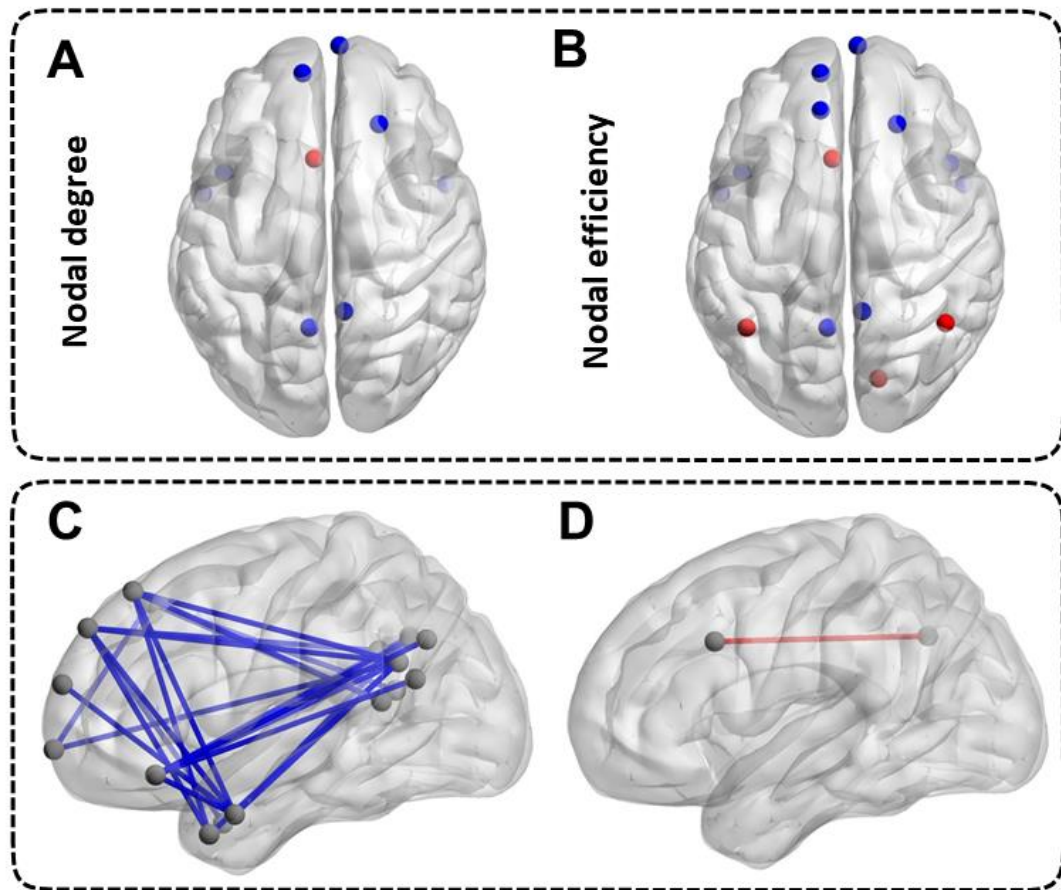

**Figure S4. Differences in Nodal Network Measures and Functional Connectivity Measures of the DMN using Power 264 Atlas**

The top half of the picture represents the differences in nodal network measures, while the bottom half of the picture represents the differences in functional connectivity measures. The blue nodes and blue lines indicate decreased nodal centralities and functional connectivities. The red nodes and red lines indicate increased nodal centralities and functional connectivities.

**Supplementary Tables**

**Table S1. Detailed information of the BN246 template and default mode network (DMN) regions selected in this study**

| <b>Gyrus</b>                | <b>Left and Right Hemisphere</b> | <b>Label ID.L</b> | <b>Label ID.R</b> | <b>lh.MNI(X,Y,Z)</b> | <b>rh.MNI(X,Y,Z)</b> |
|-----------------------------|----------------------------------|-------------------|-------------------|----------------------|----------------------|
| SFG, Superior Frontal Gyrus | SFG_L(R)_7_1                     | 1                 | 2                 | -5, 15, 54           | 7, 16, 54            |
|                             | SFG_L(R)_7_2                     | 3                 | 4                 | -18, 24, 53          | 22, 26, 51           |
|                             | SFG_L(R)_7_3                     | 5                 | 6                 | -11, 49, 40          | 13, 48, 40           |
|                             | SFG_L(R)_7_4                     | 7                 | 8                 | -18, -1, 65          | 20, 4, 64            |
|                             | SFG_L(R)_7_5                     | 9                 | 10                | -6, -5, 58           | 7, -4, 60            |
|                             | SFG_L(R)_7_6                     | 11                | 12                | -5, 36, 38           | 6, 38, 35            |
|                             | SFG_L(R)_7_7                     | 13                | 14                | -8, 56, 15           | 8, 58, 13            |
| MFG, Middle Frontal Gyrus   | MFG_L(R)_7_1                     | 15                | 16                | -27, 43, 31          | 30, 37, 36           |
|                             | MFG_L(R)_7_2                     | 17                | 18                | -42, 13, 36          | 42, 11, 39           |
|                             | MFG_L(R)_7_3                     | 19                | 20                | -28, 56, 12          | 28, 55, 17           |
|                             | MFG_L(R)_7_4                     | 21                | 22                | -41, 41, 16          | 42, 44, 14           |
|                             | MFG_L(R)_7_5                     | 23                | 24                | -33, 23, 45          | 42, 27, 39           |
|                             | MFG_L(R)_7_6                     | 25                | 26                | -32, 4, 55           | 34, 8, 54            |
|                             | MFG_L(R)_7_7                     | 27                | 28                | -26, 60, -6          | 25, 61, -4           |
| IFG, Inferior Frontal Gyrus | IFG_L(R)_6_1                     | 29                | 30                | -46, 13, 24          | 45, 16, 25           |
|                             | IFG_L(R)_6_2                     | 31                | 32                | -47, 32, 14          | 48, 35, 13           |
|                             | IFG_L(R)_6_3                     | 33                | 34                | -53, 23, 11          | 54, 24, 12           |
|                             | IFG_L(R)_6_4                     | 35                | 36                | -49, 36, -3          | 51, 36, -1           |



|                              |                       |              |    |              |             |
|------------------------------|-----------------------|--------------|----|--------------|-------------|
|                              | IFG_L(R)_6_5          | 37           | 38 | -39, 23, 4   | 42, 22, 3   |
|                              | IFG_L(R)_6_6          | 39           | 40 | -52, 13, 6   | 54, 14, 11  |
| OrG, Orbital Gyrus           | OrG_L(R)_6_1          | 41           | 42 | -7, 54, -7   | 6, 47, -7   |
|                              | OrG_L(R)_6_2          | 43           | 44 | -36, 33, -16 | 40, 39, -14 |
|                              | OrG_L(R)_6_3          | 45           | 46 | -23, 38, -18 | 23, 36, -18 |
|                              | OrG_L(R)_6_4          | 47           | 48 | -6, 52, -19  | 6, 57, -16  |
|                              | OrG_L(R)_6_5          | 49           | 50 | -10, 18, -19 | 9, 20, -19  |
|                              | OrG_L(R)_6_6          | 51           | 52 | -41, 32, -9  | 42, 31, -9  |
|                              | PrG, Precentral Gyrus | PrG_L(R)_6_1 | 53 | 54           | -49, -8, 39 |
| PrG_L(R)_6_2                 |                       | 55           | 56 | -32, -9, 58  | 33, -7, 57  |
| PrG_L(R)_6_3                 |                       | 57           | 58 | -26, -25, 63 | 34, -19, 59 |
| PrG_L(R)_6_4                 |                       | 59           | 60 | -13, -20, 73 | 15, -22, 71 |
| PrG_L(R)_6_5                 |                       | 61           | 62 | -52, 0, 8    | 54, 4, 9    |
| PrG_L(R)_6_6                 |                       | 63           | 64 | -49, 5, 30   | 51, 7, 30   |
| PCL, Paracentral Lobule      | PCL_L(R)_2_1          | 65           | 66 | -8, -38, 58  | 10, -34, 54 |
|                              | PCL_L(R)_2_2          | 67           | 68 | -4, -23, 61  | 5, -21, 61  |
| STG, Superior Temporal Gyrus | STG_L(R)_6_1          | 69           | 70 | -32, 14, -34 | 31, 15, -34 |
|                              | STG_L(R)_6_2          | 71           | 72 | -54, -32, 12 | 54, -24, 11 |
|                              | STG_L(R)_6_3          | 73           | 74 | -50, -11, 1  | 51, -4, -1  |
|                              | STG_L(R)_6_4          | 75           | 76 | -62, -33, 7  | 66, -20, 6  |
|                              | STG_L(R)_6_5          | 77           | 78 | -45, 11, -20 | 47, 12, -20 |
|                              | STG_L(R)_6_6          | 79           | 80 | -55, -3, -10 | 56, -12, -5 |

|                                          |               |     |     |               |              |
|------------------------------------------|---------------|-----|-----|---------------|--------------|
| MTG, Middle Temporal Gyrus               | MTG_L(R)_4_1  | 81  | 82  | -65, -30, -12 | 65, -29, -13 |
|                                          | MTG_L(R)_4_2  | 83  | 84  | -53, 2, -30   | 51, 6, -32   |
|                                          | MTG_L(R)_4_3  | 85  | 86  | -59, -58, 4   | 60, -53, 3   |
|                                          | MTG_L(R)_4_4  | 87  | 88  | -58, -20, -9  | 58, -16, -10 |
| ITG, Inferior Temporal Gyrus             | ITG_L(R)_7_1  | 89  | 90  | -45, -26, -27 | 46, -14, -33 |
|                                          | ITG_L(R)_7_2  | 91  | 92  | -51, -57, -15 | 53, -52, -18 |
|                                          | ITG_L(R)_7_3  | 93  | 94  | -43, -2, -41  | 40, 0, -43   |
|                                          | ITG_L(R)_7_4  | 95  | 96  | -56, -16, -28 | 55, -11, -32 |
|                                          | ITG_L(R)_7_5  | 97  | 98  | -55, -60, -6  | 54, -57, -8  |
|                                          | ITG_L(R)_7_6  | 99  | 100 | -59, -42, -16 | 61, -40, -17 |
|                                          | ITG_L(R)_7_7  | 101 | 102 | -55, -31, -27 | 54, -31, -26 |
| FuG, Fusiform Gyrus                      | FuG_L(R)_3_1  | 103 | 104 | -33, -16, -32 | 33, -15, -34 |
|                                          | FuG_L(R)_3_2  | 105 | 106 | -31, -64, -14 | 31, -62, -14 |
|                                          | FuG_L(R)_3_3  | 107 | 108 | -42, -51, -17 | 43, -49, -19 |
| PhG, Parahippocampal Gyrus               | PhG_L(R)_6_1  | 109 | 110 | -27, -7, -34  | 28, -8, -33  |
|                                          | PhG_L(R)_6_2  | 111 | 112 | -25, -25, -26 | 26, -23, -27 |
|                                          | PhG_L(R)_6_3  | 113 | 114 | -28, -32, -18 | 30, -30, -18 |
|                                          | PhG_L(R)_6_4  | 115 | 116 | -19, -12, -30 | 19, -10, -30 |
|                                          | PhG_L(R)_6_5  | 117 | 118 | -23, 2, -32   | 22, 1, -36   |
|                                          | PhG_L(R)_6_6  | 119 | 120 | -17, -39, -10 | 19, -36, -11 |
| pSTS, posterior Superior Temporal Sulcus | pSTS_L(R)_2_1 | 121 | 122 | -54, -40, 4   | 53, -37, 3   |
|                                          | pSTS_L(R)_2_2 | 123 | 124 | -52, -50, 11  | 57, -40, 12  |

|                               |               |     |     |              |             |
|-------------------------------|---------------|-----|-----|--------------|-------------|
| SPL, Superior Parietal Lobule | SPL_L(R)_5_1  | 125 | 126 | -16, -60, 63 | 19, -57, 65 |
|                               | SPL_L(R)_5_2  | 127 | 128 | -15, -71, 52 | 19, -69, 54 |
|                               | SPL_L(R)_5_3  | 129 | 130 | -33, -47, 50 | 35, -42, 54 |
|                               | SPL_L(R)_5_4  | 131 | 132 | -22, -47, 65 | 23, -43, 67 |
|                               | SPL_L(R)_5_5  | 133 | 134 | -27, -59, 54 | 31, -54, 53 |
| IPL, Inferior Parietal Lobule | IPL_L(R)_6_1  | 135 | 136 | -34, -80, 29 | 45, -71, 20 |
|                               | IPL_L(R)_6_2  | 137 | 138 | -38, -61, 46 | 39, -65, 44 |
|                               | IPL_L(R)_6_3  | 139 | 140 | -51, -33, 42 | 47, -35, 45 |
|                               | IPL_L(R)_6_4  | 141 | 142 | -56, -49, 38 | 57, -44, 38 |
|                               | IPL_L(R)_6_5  | 143 | 144 | -47, -65, 26 | 53, -54, 25 |
|                               | IPL_L(R)_6_6  | 145 | 146 | -53, -31, 23 | 55, -26, 26 |
| Pcun, Precuneus               | PCun_L(R)_4_1 | 147 | 148 | -5, -63, 51  | 6, -65, 51  |
|                               | PCun_L(R)_4_2 | 149 | 150 | -8, -47, 57  | 7, -47, 58  |
|                               | PCun_L(R)_4_3 | 151 | 152 | -12, -67, 25 | 16, -64, 25 |
|                               | PCun_L(R)_4_4 | 153 | 154 | -6, -55, 34  | 6, -54, 35  |
| PoG, Postcentral Gyrus        | PoG_L(R)_4_1  | 155 | 156 | -50, -16, 43 | 50, -14, 44 |
|                               | PoG_L(R)_4_2  | 157 | 158 | -56, -14, 16 | 56, -10, 15 |
|                               | PoG_L(R)_4_3  | 159 | 160 | -46, -30, 50 | 48, -24, 48 |
|                               | PoG_L(R)_4_4  | 161 | 162 | -21, -35, 68 | 20, -33, 69 |
| INS, Insular Gyrus            | INS_L(R)_6_1  | 163 | 164 | -36, -20, 10 | 37, -18, 8  |
|                               | INS_L(R)_6_2  | 165 | 166 | -32, 14, -13 | 33, 14, -13 |
|                               | INS_L(R)_6_3  | 167 | 168 | -34, 18, 1   | 36, 18, 1   |

|                                      |                |     |     |               |              |
|--------------------------------------|----------------|-----|-----|---------------|--------------|
|                                      | INS_L(R)_6_4   | 169 | 170 | -38, -4, -9   | 39, -2, -9   |
|                                      | INS_L(R)_6_5   | 171 | 172 | -38, -8, 8    | 39, -7, 8    |
|                                      | INS_L(R)_6_6   | 173 | 174 | -38, 5, 5     | 38, 5, 5     |
| CG, Cingulate Gyrus                  | CG_L(R)_7_1    | 175 | 176 | -4, -39, 31   | 4, -37, 32   |
|                                      | CG_L(R)_7_2    | 177 | 178 | -3, 8, 25     | 5, 22, 12    |
|                                      | CG_L(R)_7_3    | 179 | 180 | -6, 34, 21    | 5, 28, 27    |
|                                      | CG_L(R)_7_4    | 181 | 182 | -8, -47, 10   | 9, -44, 11   |
|                                      | CG_L(R)_7_5    | 183 | 184 | -5, 7, 37     | 4, 6, 38     |
|                                      | CG_L(R)_7_6    | 185 | 186 | -7, -23, 41   | 6, -20, 40   |
|                                      | CG_L(R)_7_7    | 187 | 188 | -4, 39, -2    | 5, 41, 6     |
| MVOcC, MedioVentral Occipital Cortex | MVOcC_L(R)_5_1 | 189 | 190 | -11, -82, -11 | 10, -85, -9  |
|                                      | MVOcC_L(R)_5_2 | 191 | 192 | -5, -81, 10   | 7, -76, 11   |
|                                      | MVOcC_L(R)_5_3 | 193 | 194 | -6, -94, 1    | 8, -90, 12   |
|                                      | MVOcC_L(R)_5_4 | 195 | 196 | -17, -60, -6  | 18, -60, -7  |
|                                      | MVOcC_L(R)_5_5 | 197 | 198 | -13, -68, 12  | 15, -63, 12  |
| LOcC, lateral Occipital Cortex       | LOcC_L(R)_4_1  | 199 | 200 | -31, -89, 11  | 34, -86, 11  |
|                                      | LOcC_L(R)_4_2  | 201 | 202 | -46, -74, 3   | 48, -70, -1  |
|                                      | LOcC_L(R)_4_3  | 203 | 204 | -18, -99, 2   | 22, -97, 4   |
|                                      | LOcC_L(R)_4_4  | 205 | 206 | -30, -88, -12 | 32, -85, -12 |
|                                      | LOcC_L(R)_2_1  | 207 | 208 | -11, -88, 31  | 16, -85, 34  |
|                                      | LOcC_L(R)_2_2  | 209 | 210 | -22, -77, 36  | 29, -75, 36  |
| Amyg, Amygdala                       | Amyg_L(R)_2_1  | 211 | 212 | -19, -2, -20  | 19, -2, -19  |

|                   |               |     |     |               |              |
|-------------------|---------------|-----|-----|---------------|--------------|
|                   | Amyg_L(R)_2_2 | 213 | 214 | -27, -4, -20  | 28, -3, -20  |
| Hipp, Hippocampus | Hipp_L(R)_2_1 | 215 | 216 | -22, -14, -19 | 22, -12, -20 |
|                   | Hipp_L(R)_2_2 | 217 | 218 | -28, -30, -10 | 29, -27, -10 |
| BG, Basal Ganglia | BG_L(R)_6_1   | 219 | 220 | -12, 14, 0    | 15, 14, -2   |
|                   | BG_L(R)_6_2   | 221 | 222 | -22, -2, 4    | 22, -2, 3    |
|                   | BG_L(R)_6_3   | 223 | 224 | -17, 3, -9    | 15, 8, -9    |
|                   | BG_L(R)_6_4   | 225 | 226 | -23, 7, -4    | 22, 8, -1    |
|                   | BG_L(R)_6_5   | 227 | 228 | -14, 2, 16    | 14, 5, 14    |
|                   | BG_L(R)_6_6   | 229 | 230 | -28, -5, 2    | 29, -3, 1    |
| Tha, Thalamus     | Tha_L(R)_8_1  | 231 | 232 | -7, -12, 5    | 7, -11, 6    |
|                   | Tha_L(R)_8_2  | 233 | 234 | -18, -13, 3   | 12, -14, 1   |
|                   | Tha_L(R)_8_3  | 235 | 236 | -18, -23, 4   | 18, -22, 3   |
|                   | Tha_L(R)_8_4  | 237 | 238 | -7, -14, 7    | 3, -13, 5    |
|                   | Tha_L(R)_8_5  | 239 | 240 | -16, -24, 6   | 15, -25, 6   |
|                   | Tha_L(R)_8_6  | 241 | 242 | -15, -28, 4   | 13, -27, 8   |
|                   | Tha_L(R)_8_7  | 243 | 244 | -12, -22, 13  | 10, -14, 14  |
|                   | Tha_L(R)_8_8  | 245 | 246 | -11, -14, 2   | 13, -16, 7   |

This table illustrates the detailed information of the BN246 template, more descriptions please see <http://atlas.brainnetome.org>

The regions highlighted in blue represent anterior DMN regions; the regions highlighted in red represent posterior DMN regions.

**Table S2. Descriptions of the graph measures**

| <b>Graph measure</b>       | <b>Definition</b>                                                                                                                                       | <b>Meaning</b>                                                                                                                                                                    |
|----------------------------|---------------------------------------------------------------------------------------------------------------------------------------------------------|-----------------------------------------------------------------------------------------------------------------------------------------------------------------------------------|
| Clustering coefficient     | quantifies the number of connections that exist between the nearest neighbors of a region as a proportion of the maximum number of possible connections | a measure of local network connectivity (i.e. a network with a high clustering coefficient is characterized by densely connected local clusters)                                  |
| Characteristic path length | the minimum number of connections that must be traversed from one region to another region                                                              | a measure of global network connectivity (i.e. a network with low characteristic path length is characterized by short distances between two nodes)                               |
| Gamma                      | normalized clustering coefficient (compared to 100 random network)                                                                                      | imply network segregation of network                                                                                                                                              |
| Lambda                     | normalized characteristic path length (compared to 100 random network)                                                                                  | imply network integration of the network                                                                                                                                          |
| Sigma                      | the proportion of Gamma and Lambda (compared to 100 random networks)                                                                                    | evaluate the balance of segregation and integration of the network                                                                                                                |
| Global efficiency          | the average of inverse shortest path length of the whole network, which is inversely related to the characteristic path length                          | reflects the average efficiency of global network, represents the capacity of parallel information transmission over the network                                                  |
| Local efficiency           | the average of the global efficiency of the sub-networks computed on the nearest neighbors of a region, which is related to the clustering coefficient  | reflects the average efficiency of local network, represents the capacity of a network to transmit information at the local level and measures the fault tolerance of the network |
| Nodal degree               | the number of edges of a node that connect with the remaining nodes in the network                                                                      | measures how interactive a particular node is in the network                                                                                                                      |
| Nodal efficiency           | the inverse of the harmonic mean of the shortest path length in the network                                                                             | quantifies the importance of the nodes for communication within the network                                                                                                       |
| Nodal betweenness          | the fraction of shortest paths between two nodes passing through the area in the network                                                                | measures the influence of a region on network communication                                                                                                                       |

**Table S3. Significant Correlation between Gut Microbiota, Inflammatory Cytokines, Cognitive Assessments and DMN parameters in ESRD Group**

| <b>Factor1</b> | <b>Factor2</b>       | <b>r value</b> | <b>P value</b> |
|----------------|----------------------|----------------|----------------|
| aDMN-pDMN      | MoCA                 | 0.363          | 0.012          |
| aDMN-pDMN      | TNF $\alpha$         | -0.354         | 0.015          |
| aDMN-pDMN      | Vogesella            | -0.463         | 0.046          |
| aGamma         | Odoribacter          | 0.324          | 0.026          |
| aGamma         | Selenomonas          | 0.309          | 0.034          |
| aGamma         | Schwartzia           | 0.309          | 0.034          |
| aGamma         | Syntrophus           | 0.304          | 0.038          |
| aGamma         | MoCA                 | 0.356          | 0.014          |
| aGamma         | NCT                  | 0.396          | 0.006          |
| aGamma         | DST                  | -0.337         | 0.021          |
| aGamma         | SDT                  | 0.443          | 0.002          |
| aGamma         | TNF $\alpha$         | 0.410          | 0.004          |
| aSigma         | MoCA                 | 0.378          | 0.009          |
| aSigma         | NCT                  | 0.366          | 0.011          |
| aSigma         | DST                  | -0.318         | 0.029          |
| aSigma         | SDT                  | 0.454          | 0.001          |
| aSigma         | SAS                  | 0.307          | 0.036          |
| aSigma         | TNF $\alpha$         | 0.360          | 0.013          |
| aCp            | Collinsella          | -0.394         | 0.006          |
| aCp            | Coprobacillus        | -0.350         | 0.016          |
| aCp            | Prevotella           | -0.346         | 0.017          |
| aCp            | Comamonas            | -0.343         | 0.018          |
| aCp            | Epulopiscium         | -0.302         | 0.039          |
| aCp            | Helicobacter         | -0.302         | 0.039          |
| aEloc          | Collinsella          | -0.356         | 0.014          |
| aEloc          | Coprobacillus        | -0.351         | 0.016          |
| aEloc          | Comamonas            | -0.331         | 0.023          |
| aEloc          | Prevotella           | -0.311         | 0.034          |
| MoCA           | Lachnospira          | -0.472         | 0.041          |
| MoCA           | cc_115               | -0.520         | 0.022          |
| MoCA           | Candidatus_Rhodoluna | -0.584         | 0.009          |
| MoCA           | Sediminibacterium    | -0.520         | 0.022          |
| MoCA           | Finegoldia           | -0.520         | 0.022          |
| NCT            | Prevotella           | 0.479          | 0.038          |
| NCT            | Paraprevotella       | 0.508          | 0.026          |

|               |                    |        |       |
|---------------|--------------------|--------|-------|
| NCT           | Slackia            | -0.496 | 0.031 |
| NCT           | Bacillus           | 0.498  | 0.030 |
| SDT           | Anaerofustis       | -0.459 | 0.048 |
| DST           | Clostridium        | -0.474 | 0.040 |
| DST           | Granulicatella     | -0.461 | 0.047 |
| DST           | Rothia             | -0.463 | 0.046 |
| DST           | Oribacterium       | -0.461 | 0.047 |
| DST           | Moryella           | -0.456 | 0.050 |
| DST           | Actinobacillus     | -0.477 | 0.039 |
| DST           | Actinomyces        | -0.499 | 0.030 |
| DST           | Parvimonas         | -0.550 | 0.015 |
| DST           | Peptostreptococcus | -0.456 | 0.050 |
| DST           | Bulleidia          | -0.456 | 0.050 |
| DST           | Cardiobacterium    | -0.456 | 0.050 |
| DST           | Chryseobacterium   | -0.456 | 0.050 |
| DST           | SMB53              | -0.461 | 0.047 |
| DST           | Methylobacterium   | -0.456 | 0.050 |
| DST           | TG5                | -0.456 | 0.050 |
| DST           | Peptoniphilus      | -0.456 | 0.050 |
| SAS           | Megasphaera        | 0.536  | 0.018 |
| SAS           | Parabacteroides    | 0.654  | 0.002 |
| SDS           | Parabacteroides    | 0.472  | 0.041 |
| SDS           | Paraprevotella     | -0.484 | 0.036 |
| TNF $\alpha$  | SDS                | 0.417  | 0.004 |
| TNF- $\alpha$ | Veillonella        | 0.506  | 0.027 |
| TNF- $\alpha$ | Megasphaera        | 0.484  | 0.036 |
| TNF- $\alpha$ | Parabacteroides    | 0.552  | 0.014 |
| IFN- $\gamma$ | Oscillospira       | -0.503 | 0.047 |
| IFN- $\gamma$ | Acidaminococcus    | 0.668  | 0.005 |
| IL-6          | Coprococcus        | 0.613  | 0.009 |
| IL-6          | Dialister          | 0.655  | 0.004 |
| IL-6          | Anaerofustis       | 0.767  | 0.001 |



**Table S4. Brain network graph measures in ESRD patients and HC using Power 264 Atlas**

|           | <b>ESRD (n=28)</b> | <b>HC (n=19)</b> | <b>P value</b> |
|-----------|--------------------|------------------|----------------|
| aDMN-pDMN | 0.454 ± 0.177      | 0.645 ± 0.116    | <b>0.001</b>   |
| aGamma    | 0.613 ± 0.103      | 0.483 ± 0.078    | <b>0.002</b>   |
| aLambda   | 0.390 ± 0.021      | 0.397 ± 0.017    | 0.238          |
| aSigma    | 0.501 ± 0.085      | 0.389 ± 0.067    | <b>0.002</b>   |
| aCp       | 0.075 ± 0.008      | 0.081 ± 0.012    | <b>0.003</b>   |
| aLp       | 1.138 ± 0.125      | 1.067 ± 0.089    | 0.065          |
| aEg       | 0.092 ± 0.010      | 0.100 ± 0.009    | <b>0.015</b>   |
| aEloc     | 0.140 ± 0.018      | 0.156 ± 0.022    | <b>0.009</b>   |

aCp: the area under curve of clustering coefficient; aDMN: anterior default mode network; aEg: the area under curve of global efficiency; aEloc: the area under curve of local efficiency; aGamma: the area under curve of Gamma; aLambda: the area under curve of Lambda; aLp: the area under curve of characteristic path length; aSigma: the area under curve of Sigma; ESRD: end-stage renal disease; HC: healthy control; pDMN: posterior default mode network

**Power 264 Atlas** refers to Power JD, Mitra A, Laumann TO, Snyder AZ, Schlaggar BL, Petersen SE. Methods to detect, characterize, and remove motion artifact in resting state fMRI. *Neuroimage*. 2014; 84: 320-41.
